# Supplementary material for: Promoting form I′ crystallization and melting-recrystallization by adding a β-nucleating agent into poly(butene-1)/isotactic polypropylene blends
Source: Royal Society of Chemistry journal article supplement (doi:10.1039/d3ce00212h), 2023-01-01
Supplement: d3ce00212h1.pdf [file d3ce00212h1.pdf]

*Supporting information*

**Promoting form I' Crystallization and Melting-recrystallization By  
Adding WBG-II into Poly(butene-1)/ isotactic Polypropylene Blends**

*Min Xu<sup>a,b</sup>, Yu Han<sup>b</sup>, Xiangyang Li<sup>b\*</sup>, Jianjun Ding<sup>b</sup>, Yongxing Lin<sup>b</sup>, Lin Chen<sup>b</sup> and  
Xingyou Tian<sup>b</sup>*

<sup>a</sup>Anhui University, Hefei 230601, China

<sup>b</sup>Key Laboratory of Photovoltaic and Energy Conservation Materials, Institute of Solid State Physics, Hefei Institutes of Physical Science, Chinese Academy of Sciences, Hefei 230031, China.

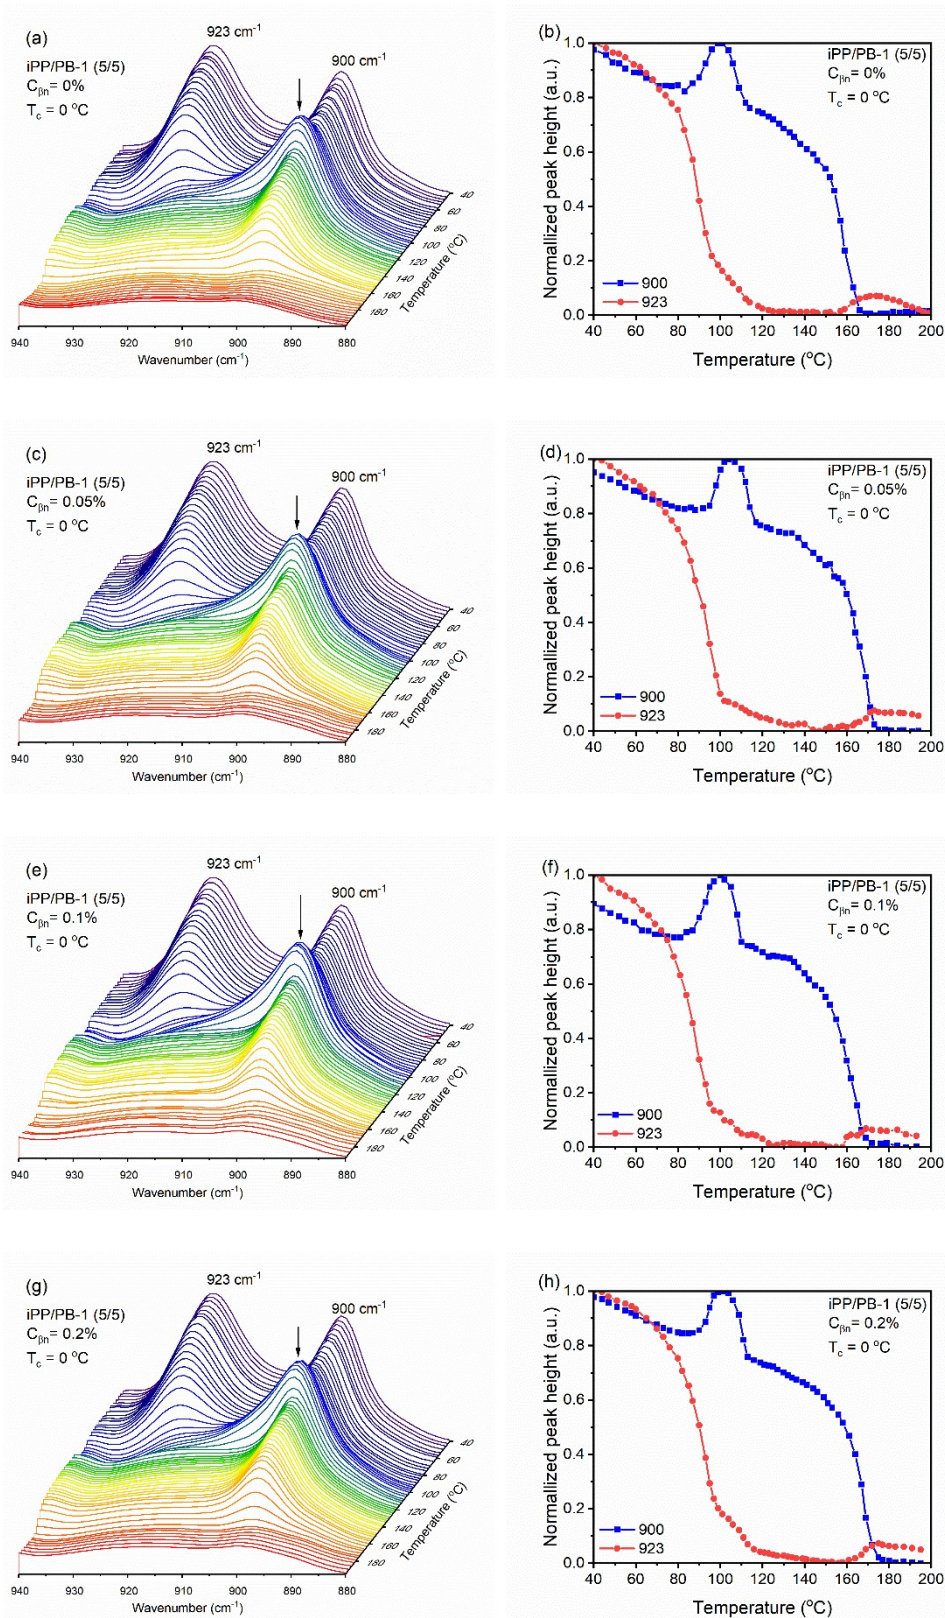

**Figure S1.** FTIR spectra collected during heating after quenching iPP/PB-1 (5/5) melt without (a), with 0.05 wt% (c), 0.1 wt% (e) and 0.2 wt% WBG-II (g) from 220 °C to 0 °C. (b), (d), (f) and (h) are peak height changes at 900 and 923  $\text{cm}^{-1}$  during heating in



(a), (c), (e) and (g), respectively.

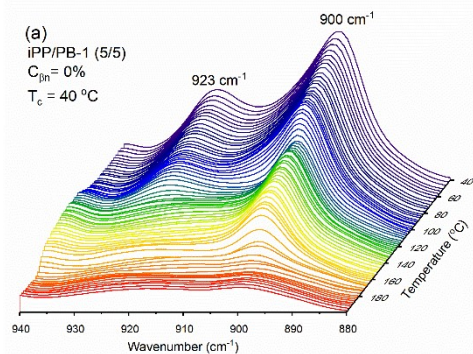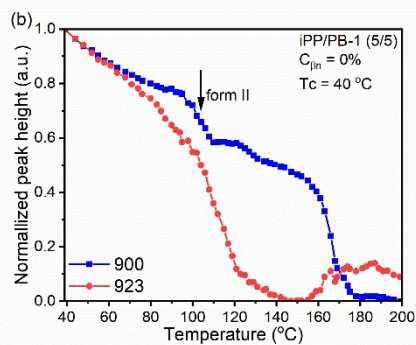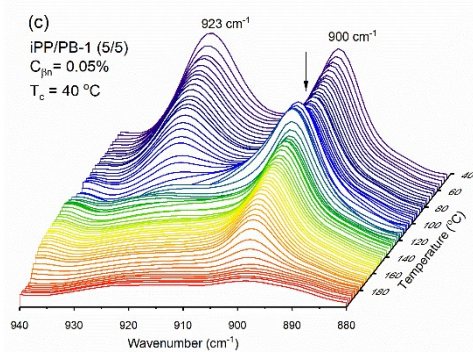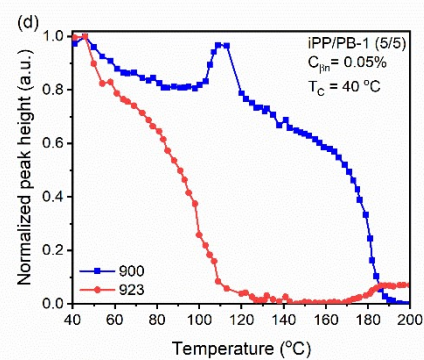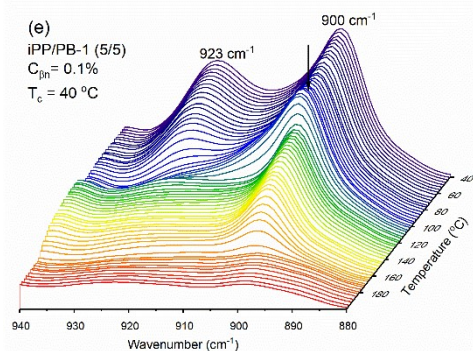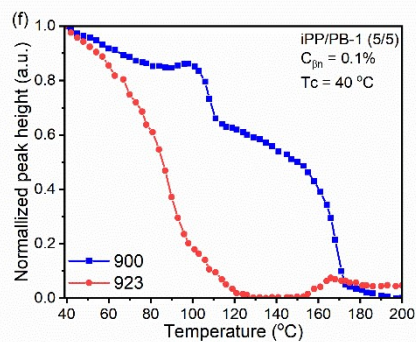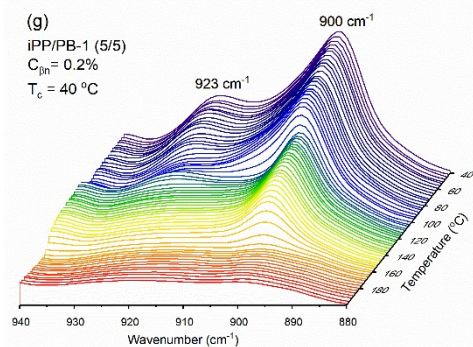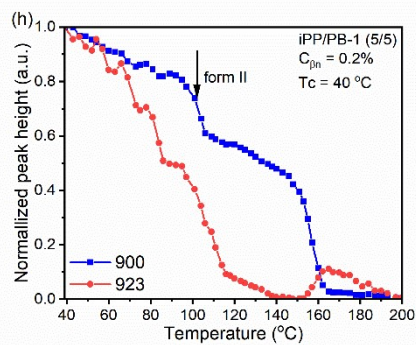



**Figure S2.** FTIR spectra collected during heating after quenching iPP/PB-1 (5/5) melt without (a), with 0.05 wt% (c), 0.1 wt% (e) and 0.2 wt% WBG-II (g) from 220 °C to 40 °C. (b), (d), (f) and (h) are peak height changes at 900 and 923 cm<sup>-1</sup> during heating in (a), (c), (e) and (g), respectively.

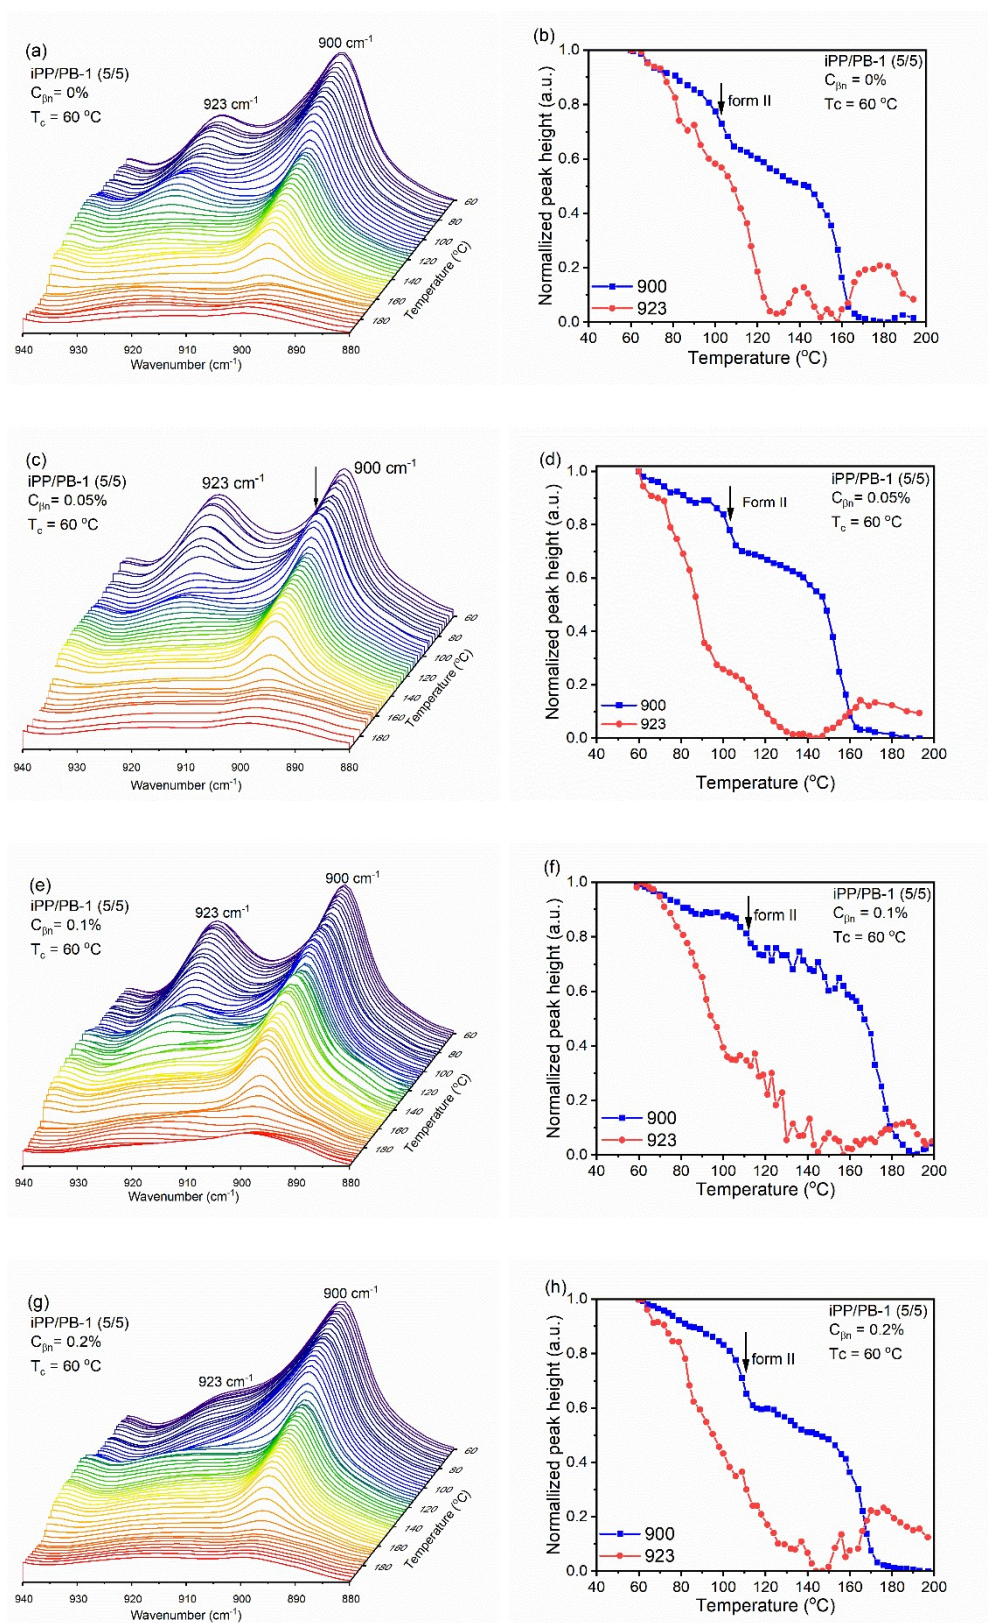



**Figure S3.** FTIR spectra collected during heating after quenching iPP/PB-1 (5/5) melt with 0 wt% (a), 0.05 wt% (c), 0.1 wt% (e) and 0.2 wt% WBG-II (g) from 220 °C to 60 °C. (b), (d), (f) and (h) are peak height changes at 900 cm<sup>-1</sup> and 923 cm<sup>-1</sup> during heating in (a), (c), (e) and (g), respectively.

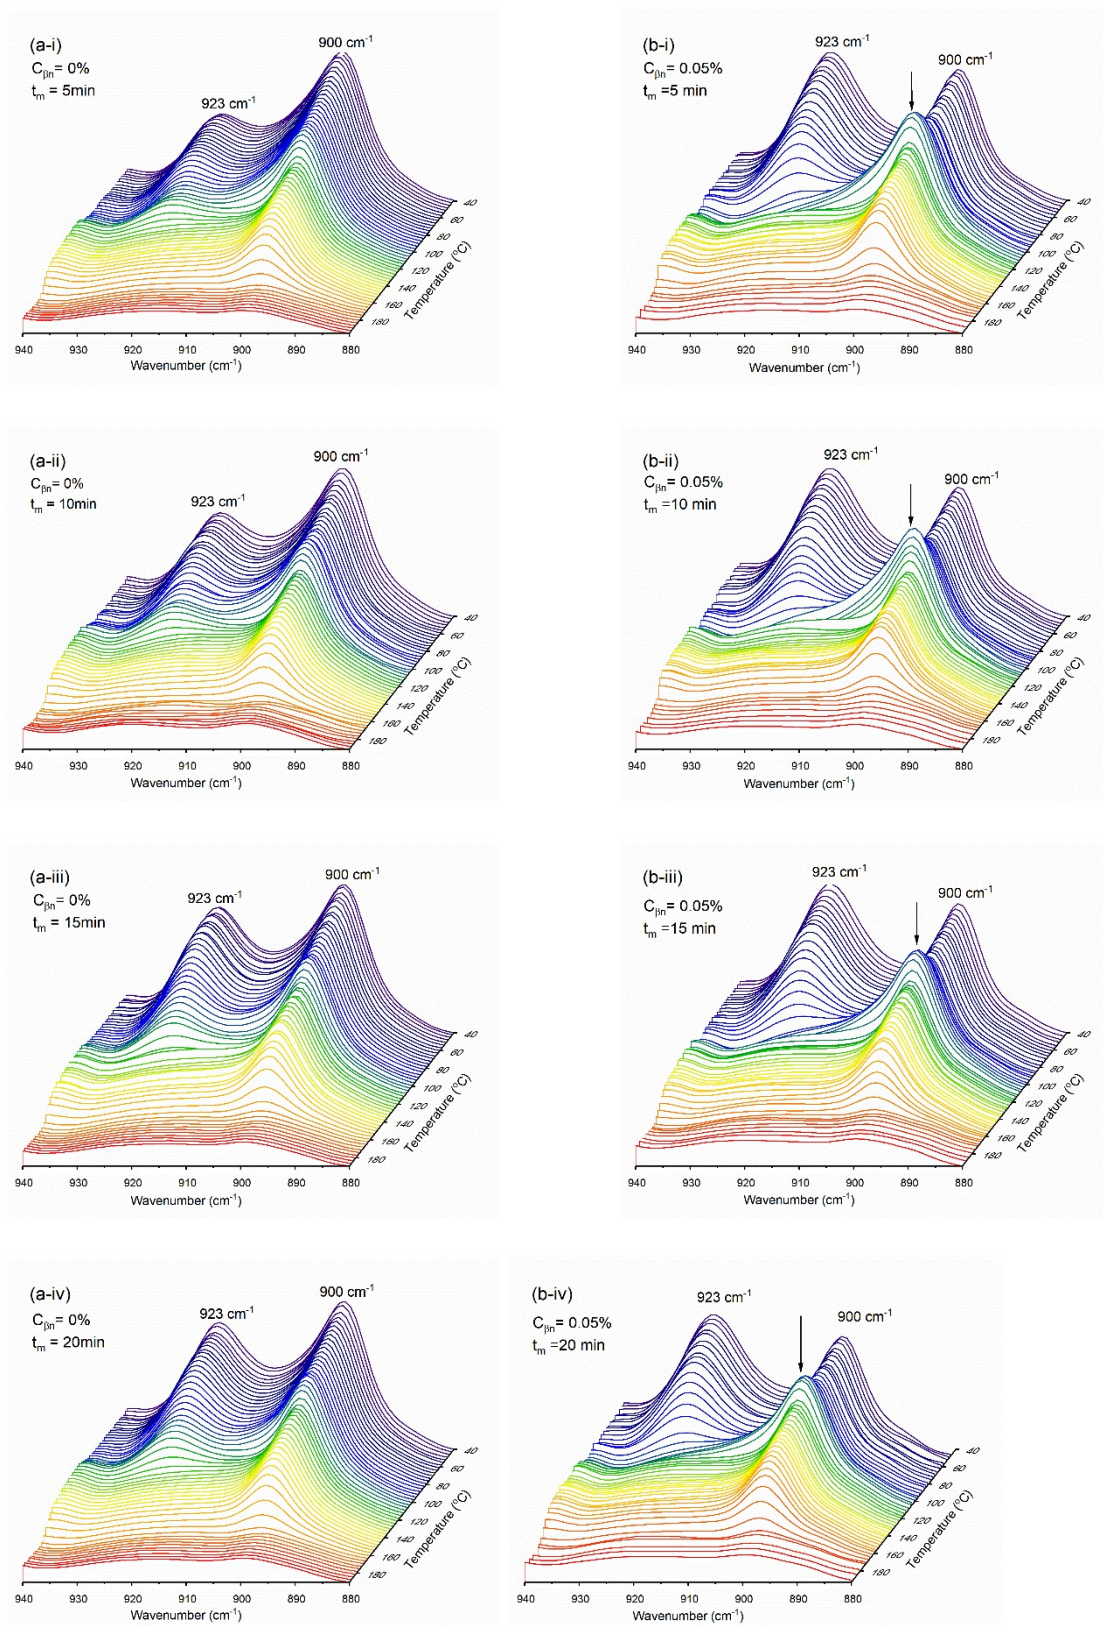



**Figure S4.** IR spectra collected during heating of iPP/PB-1 (5/5) blends with and without 0.05 wt% WBG-II obtained by quenching after heating at 220 °C for different time.

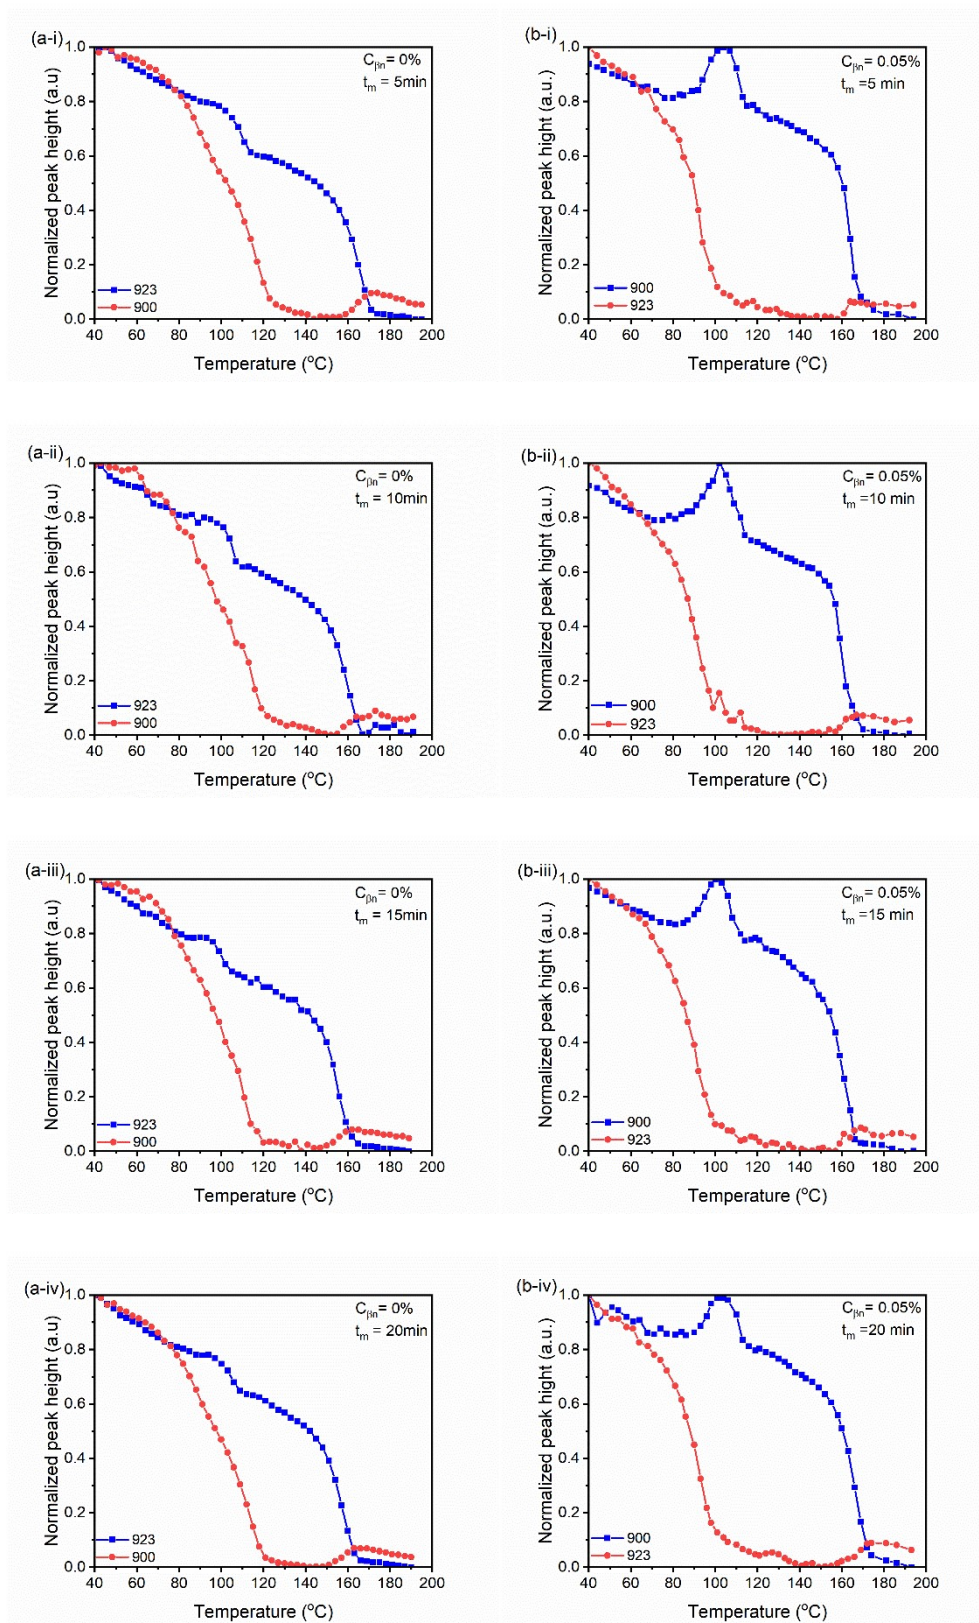

**Figure S5.** Changes of peak height at 900 and 923  $\text{cm}^{-1}$  in Figure S4.

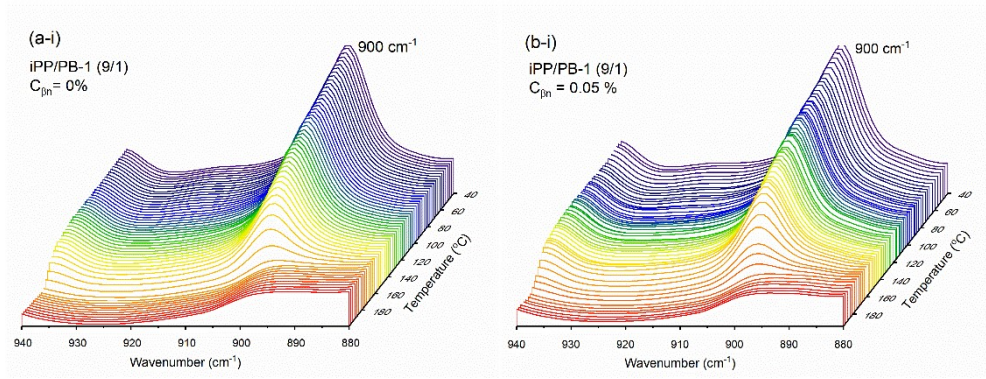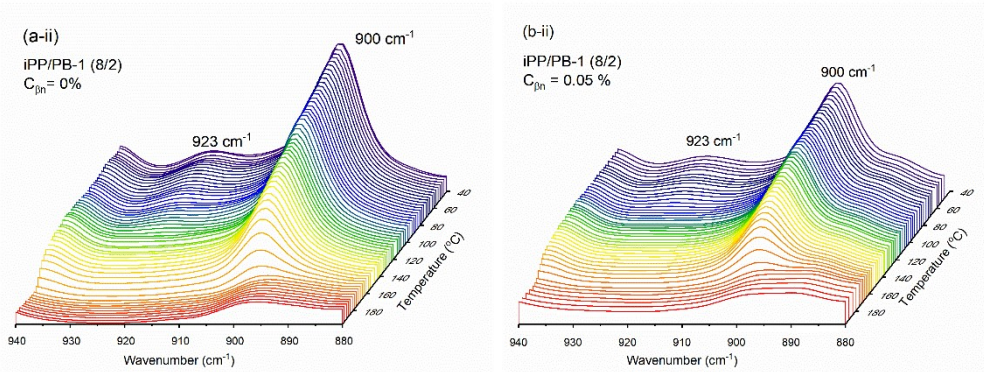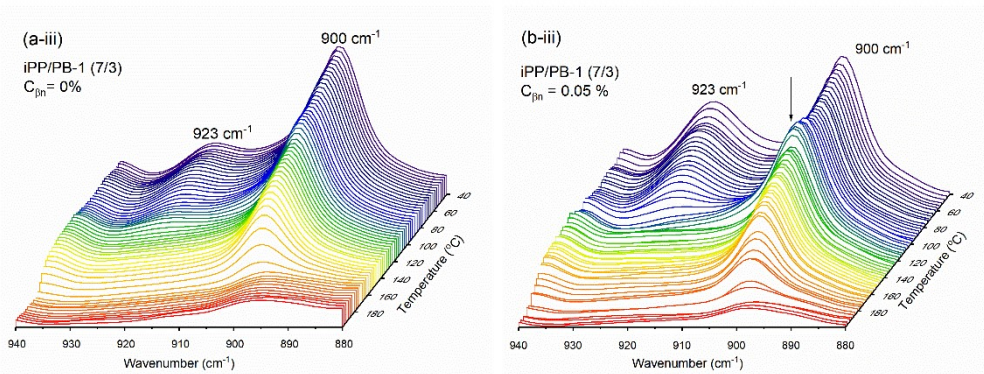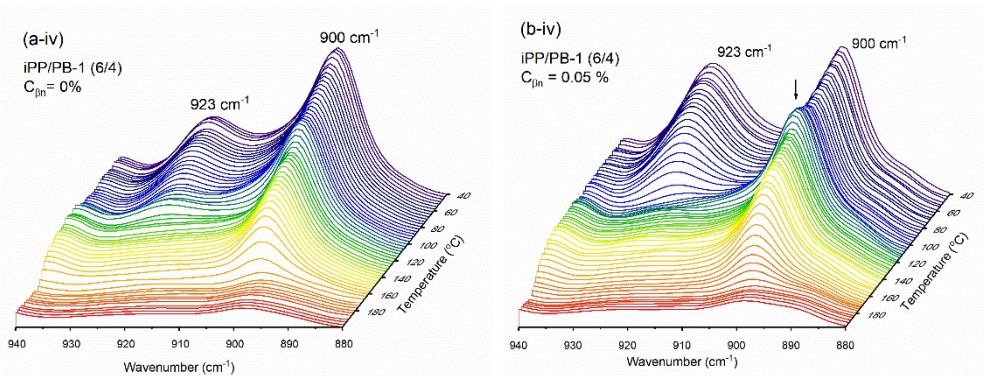



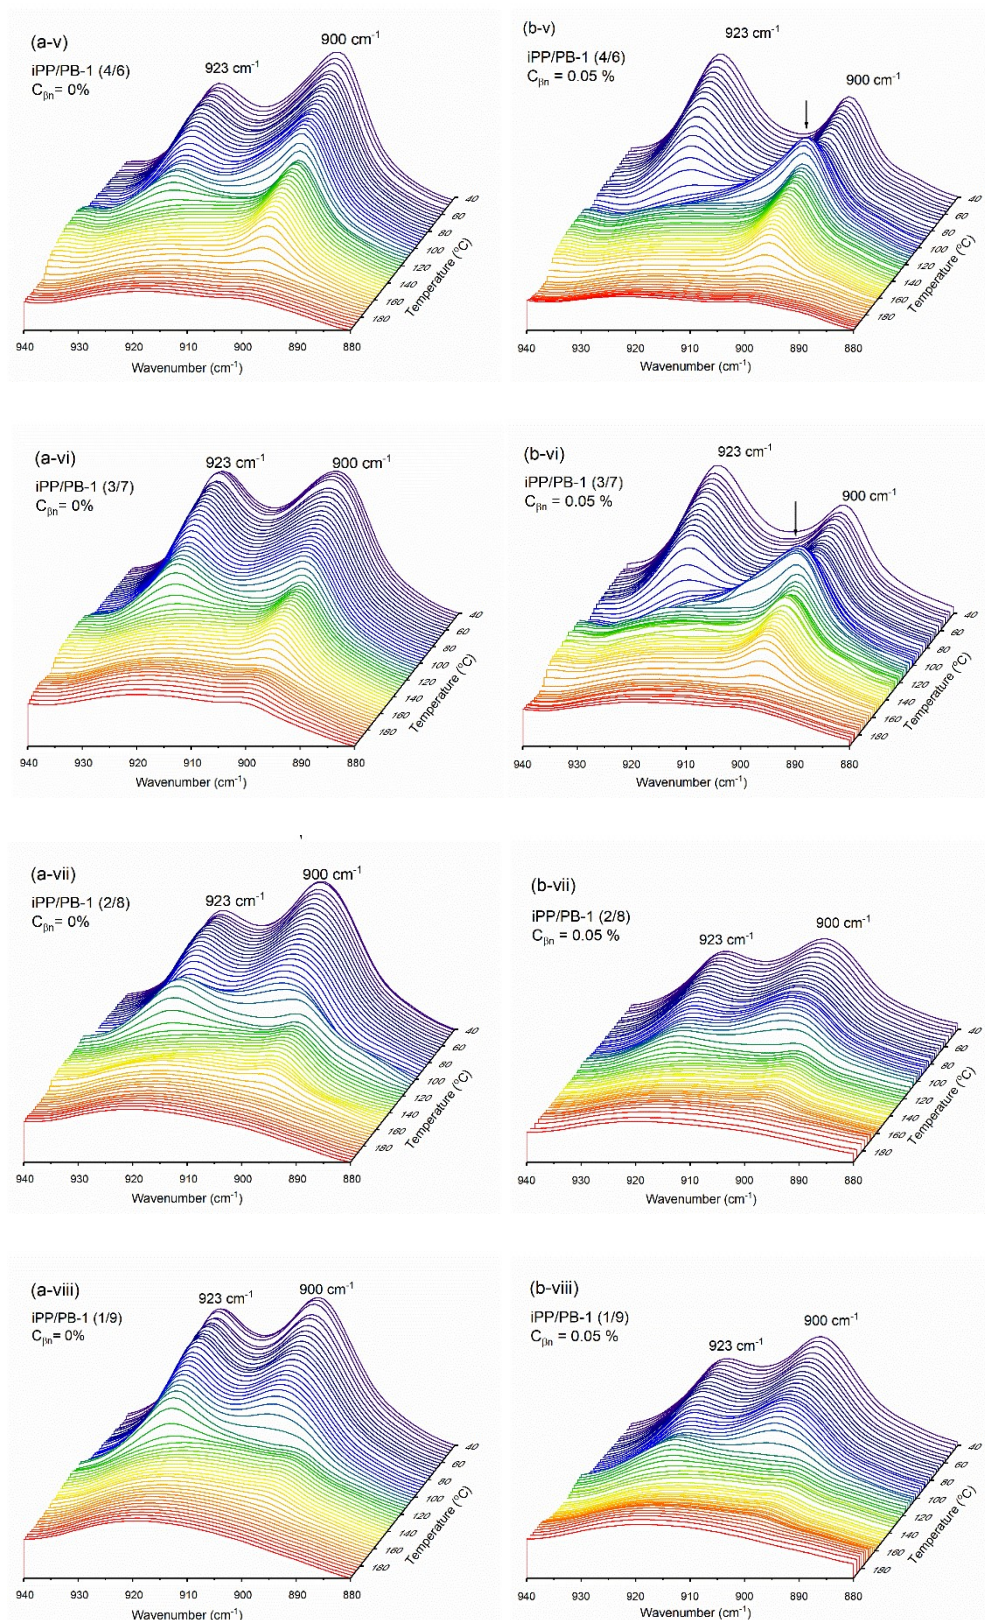

**Figure S6.** IR spectra collected during heating of different ratios of iPP/PB-1 blends with 0 wt% (a) or 0.05 wt% WBG-II (b) from room temperature to 200 °C. To avoid form II to form I phase transition at room temperature, the blends were heated immediately after quenching to room temperature.



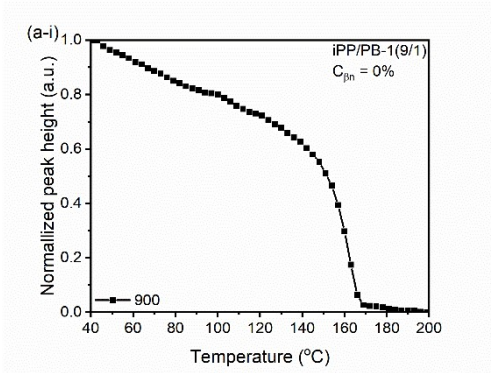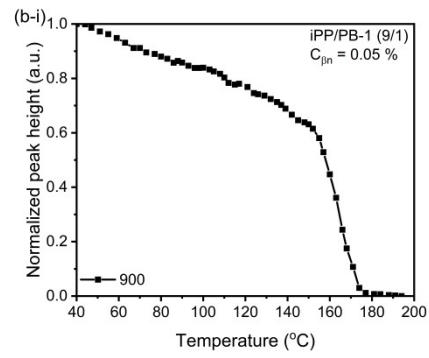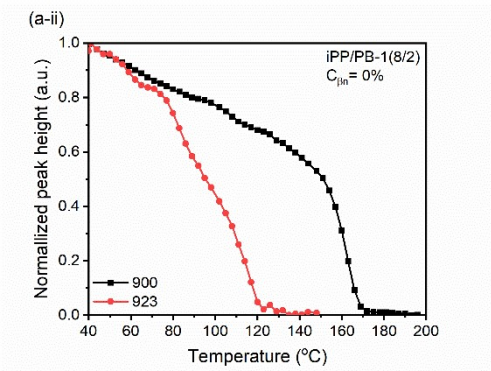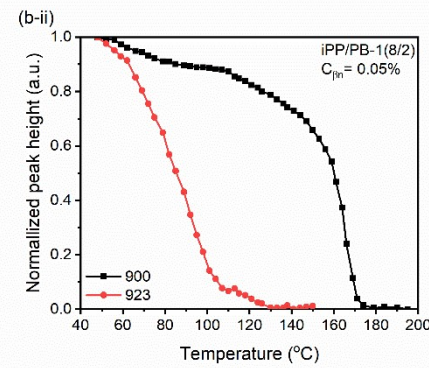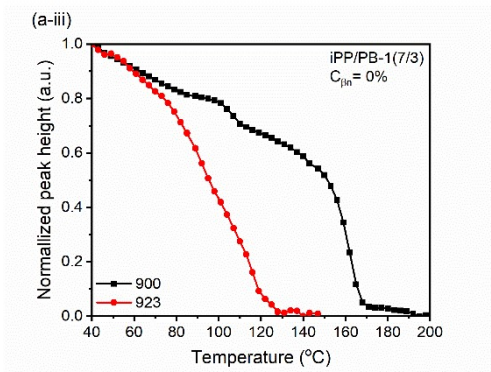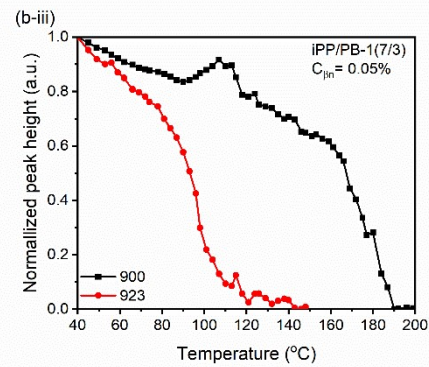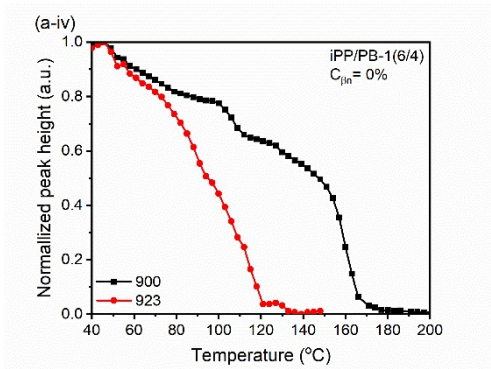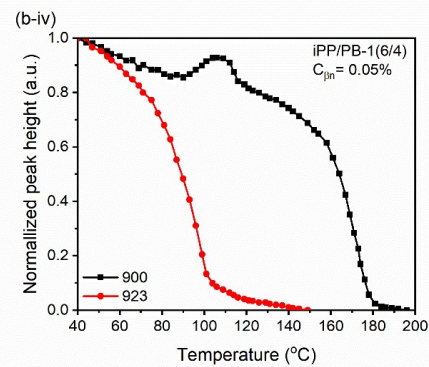

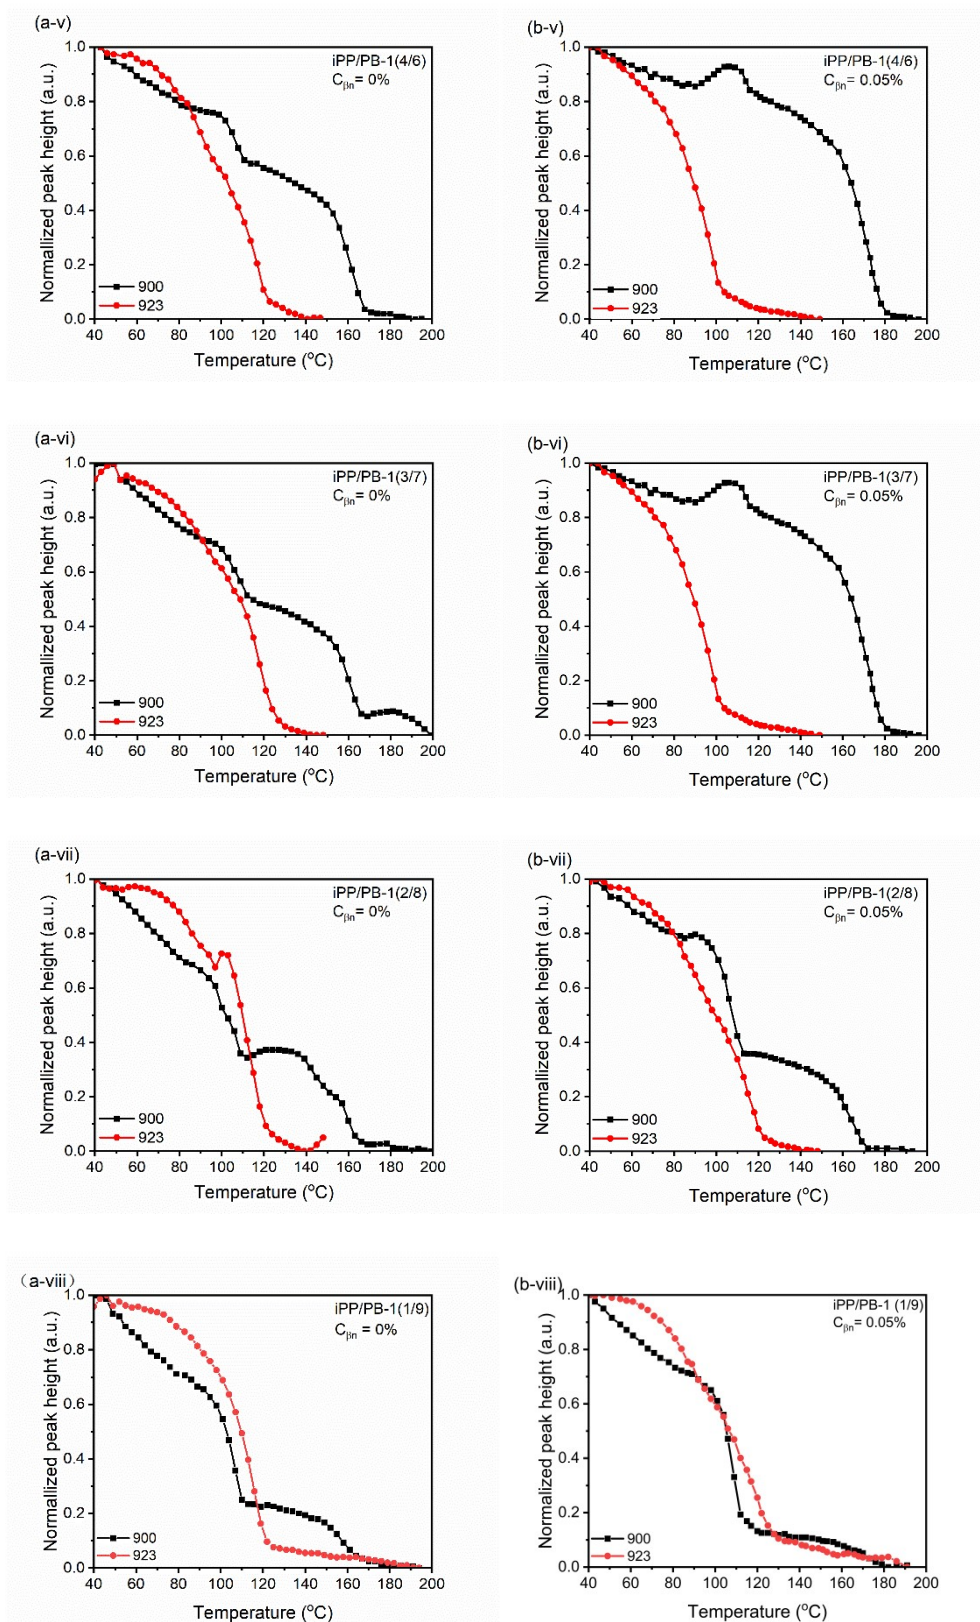

**Figure S7.** Changes of peak height at 900 and 923  $cm^{-1}$  during heating of different ratio of iPP/PB-1 blends without and with 0.05 wt% WBG-II in Figure S6.
